# Supplementary material for: Dead cells release a ‘necrosignal’ that activates antibiotic survival pathways in bacterial swarms
Source: PubMed Central journal article supplement (PMC7438516; doi:10.1038/s41467-020-17709-0), 2020-08-19
Supplement: 41467_2020_17709_MOESM1_ESM.pdf [file 41467_2020_17709_MOESM1_ESM.pdf]

# **Supplementary Figures and Tables**

*for*

**Dead cells release a necrosignal that activates antibiotic survival pathways in  
bacterial swarms**

Souvik Bhattacharyya, David M. Walker, and Rasika M. Harshey

Department of Molecular Biosciences

University of Texas at Austin

Austin, TX 78712

## Supplementary Figures

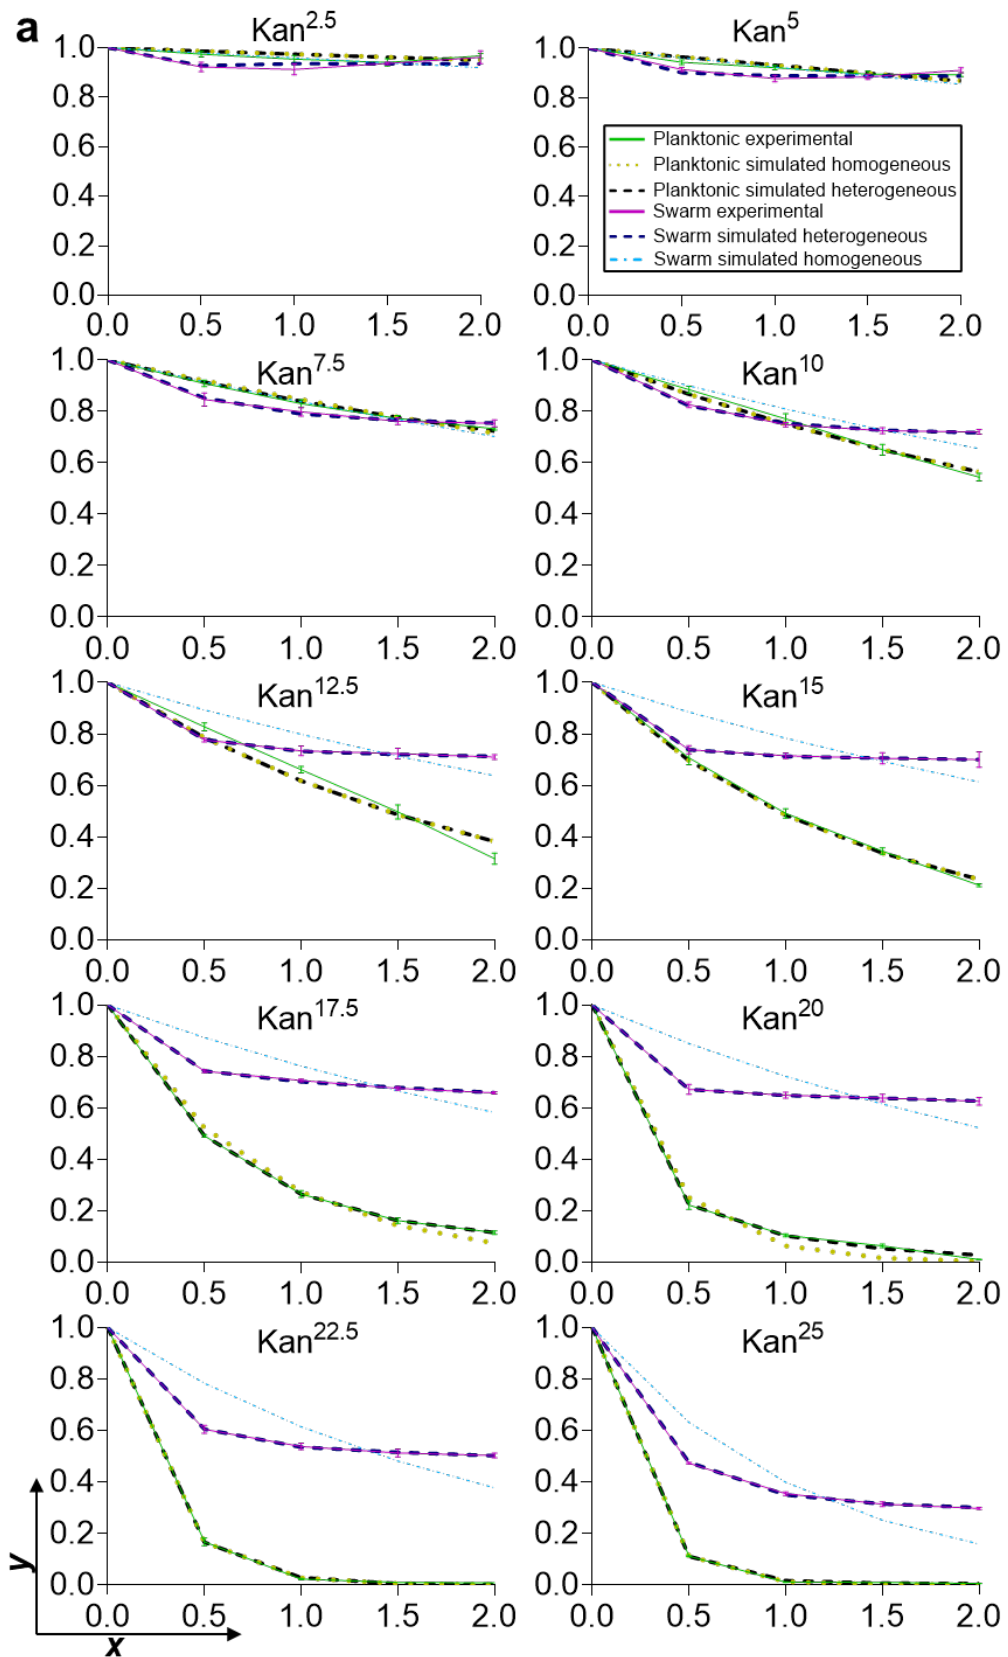

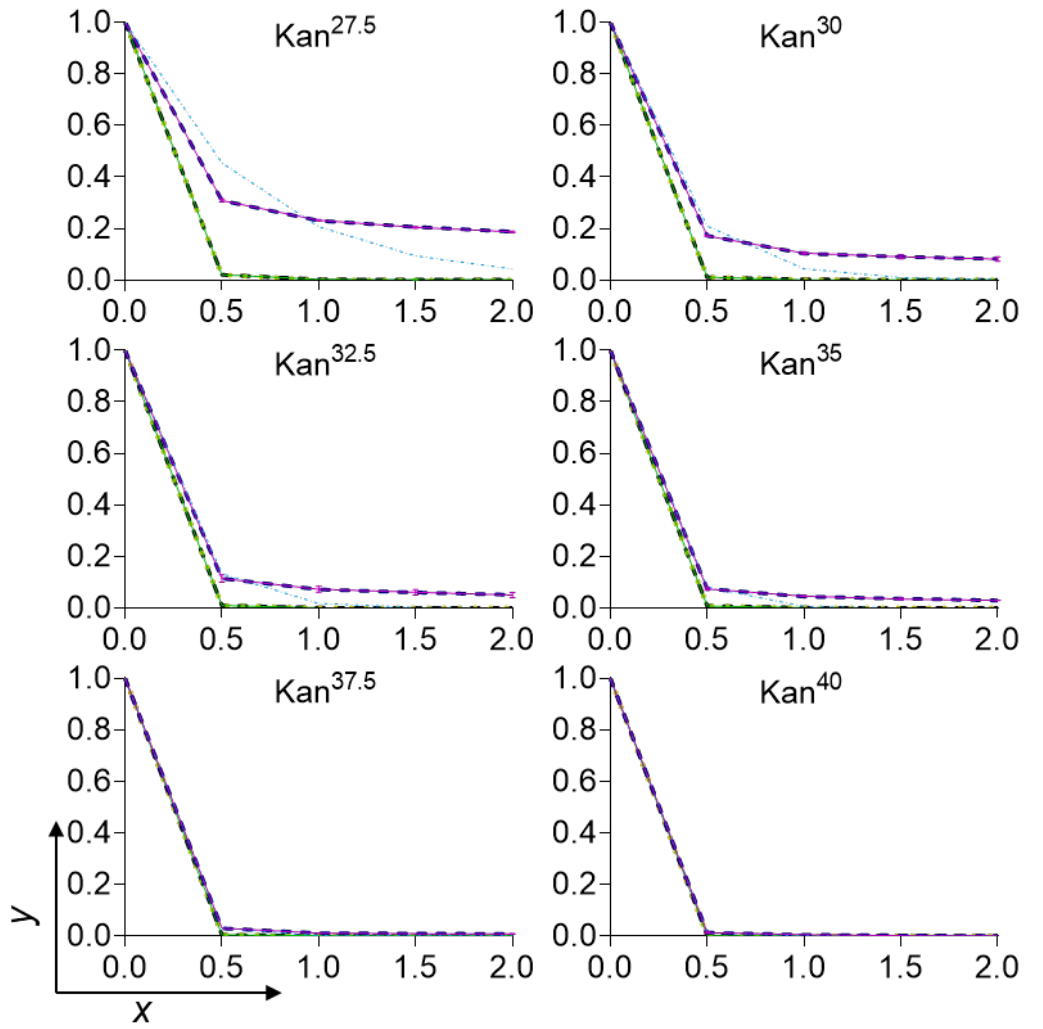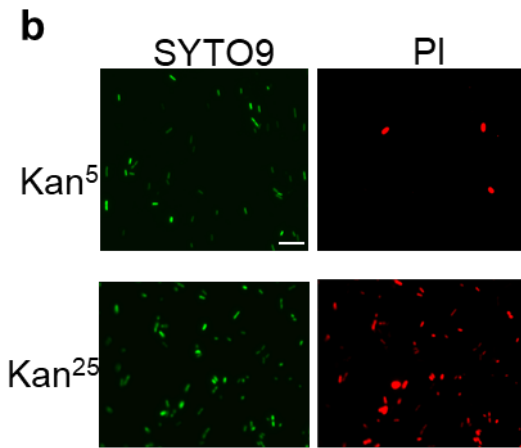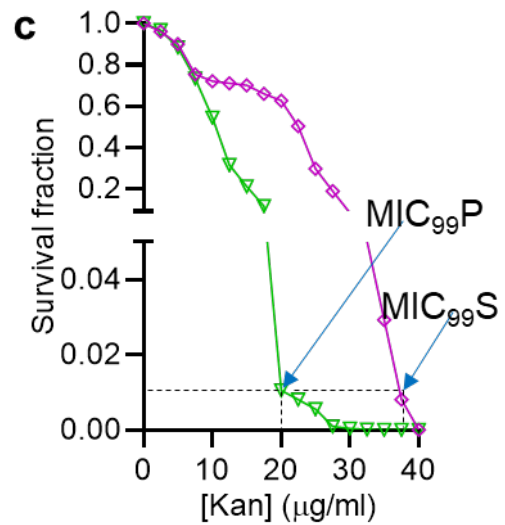

**Supplementary Figure 1. Experimental and simulated kanamycin survival curves** a. Survival curves of planktonic versus swarm populations (solid lines) at kanamycin (Kan) concentrations ranging from 2.5 to

40  $\mu\text{g/ml}$ . The superscript following Kan refers to  $\mu\text{g/ml}$ . Time in hours is plotted on the **x** axis, and fraction survived (as determined by CFU counts) on the **y** axis. Multiple unpaired t-tests, with statistical significance determined using the Holm-Sidak method (with  $\alpha = 0.05$ ), were performed on all experimental data points (see Supplementary Table 2 for p values); at early time points (0.5 h) in Kan<sup>2.5</sup>-Kan<sup>35</sup>, p values are significant and have a range of \* $p < 0.05$  to \*\* $p < 0.001$ . The experimental data was simulated assuming either heterogeneous or a homogeneous planktonic or swarm populations, as described in Methods, and the best fit of the simulation to the experimental data is shown (dotted lines). See inset at the top right for legend keys. Graphs showing the distribution of the mean squared errors (MSE) between simulated and experimental data sets are shown in Figure 1a. **b.** Representative Live-Dead staining images of swarm cells treated with Kan<sup>5</sup> and Kan<sup>25</sup> for 0.5 h, confirming the CFU count data in **a.** All cells are stained with the green dye SYTO9, but only cells with membrane damage (dead cells) stain with the red dye propidium iodide (PI). Scale bar, 10  $\mu\text{m}$  **c.** Determination of MIC (minimum inhibitory concentration) for Kan from survival curves at 2 h shown in **a.** MIC<sub>99</sub>, the antibiotic concentration required to kill 99% of the population is Kan<sup>19</sup> for planktonic cells (green, MIC<sub>99P</sub>), and Kan<sup>37.5</sup> for swarm cells (red, MIC<sub>99S</sub>). Source data are provided as a Source Data file.

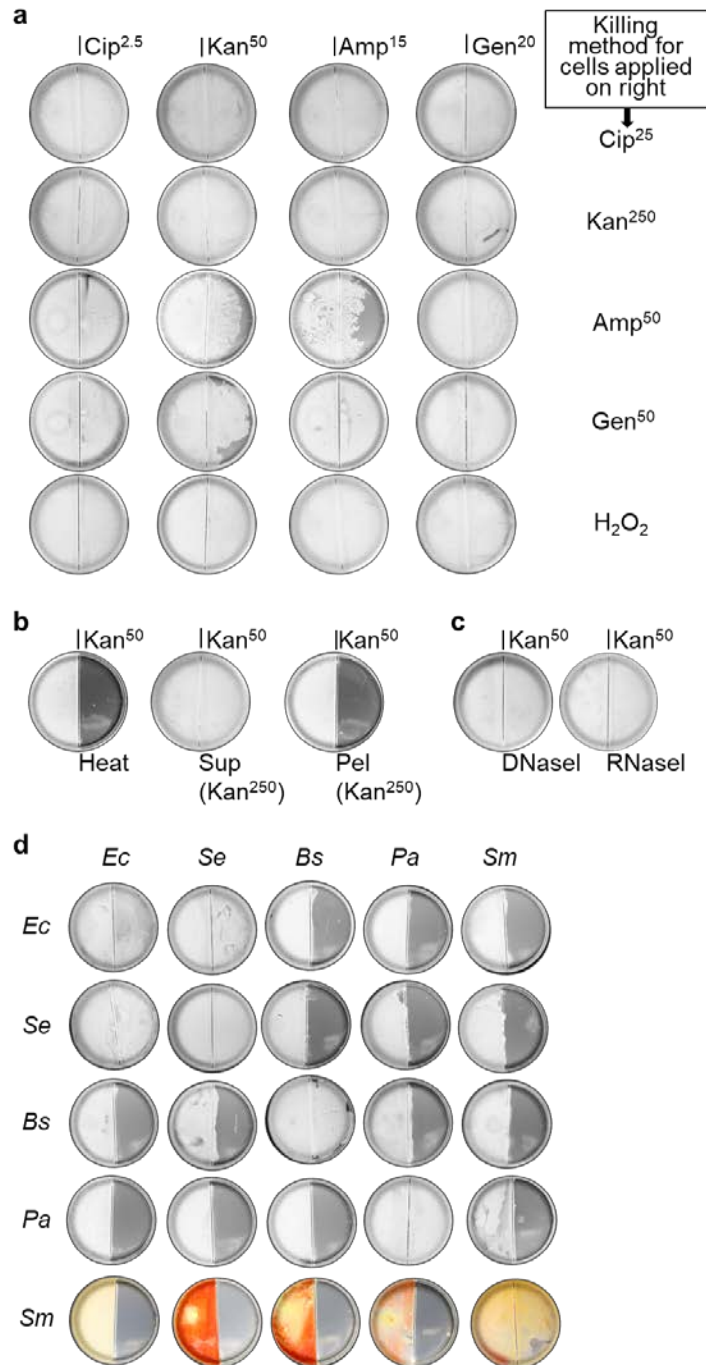

**Supplementary Figure 2. Characteristics of the necrosignal.** **a.** Dead cell-promoted SR is independent of the killing method. *E. coli* swarms are sensitive to Cip<sup>2.5</sup>, Kan<sup>25</sup>, Amp<sup>15</sup> and Gen<sup>20</sup>. Wild type *E. coli* cells were inoculated on the left, and cells killed by indicated methods were applied on the right. Antibiotics applied to the right are indicated. **b.** The necrosignal is heat-sensitive and found in the supernatant fraction of cell extracts from killed *E. coli*. Heat killed cells (Heat) or supernatant (Sup) and pellet (Pel) fractions from cells killed with Kan<sup>250</sup>, were applied to the right to assess swarming on Kan<sup>50</sup>. **c.** The necrosignal is not DNA or RNA. Supernatant from cells killed with Kan<sup>250</sup> were treated with DNaseI and RNaseI and applied on the right. **d.** Species-specificity of necrosignaling. This panel shows the raw data for results summarized in Figure 1e. The right chamber contained Kan<sup>50</sup> for *Ec*, *Se*, and *Bs*; Kan<sup>75</sup> for *Sm*; Kan<sup>125</sup> for *Pa*. Except for *Pseudomonas*, which was pre-killed by Kan<sup>500</sup>, all others were pre-killed Kan<sup>250</sup>. *S. marcescens* makes a red pigment in stationary phase<sup>1</sup>.

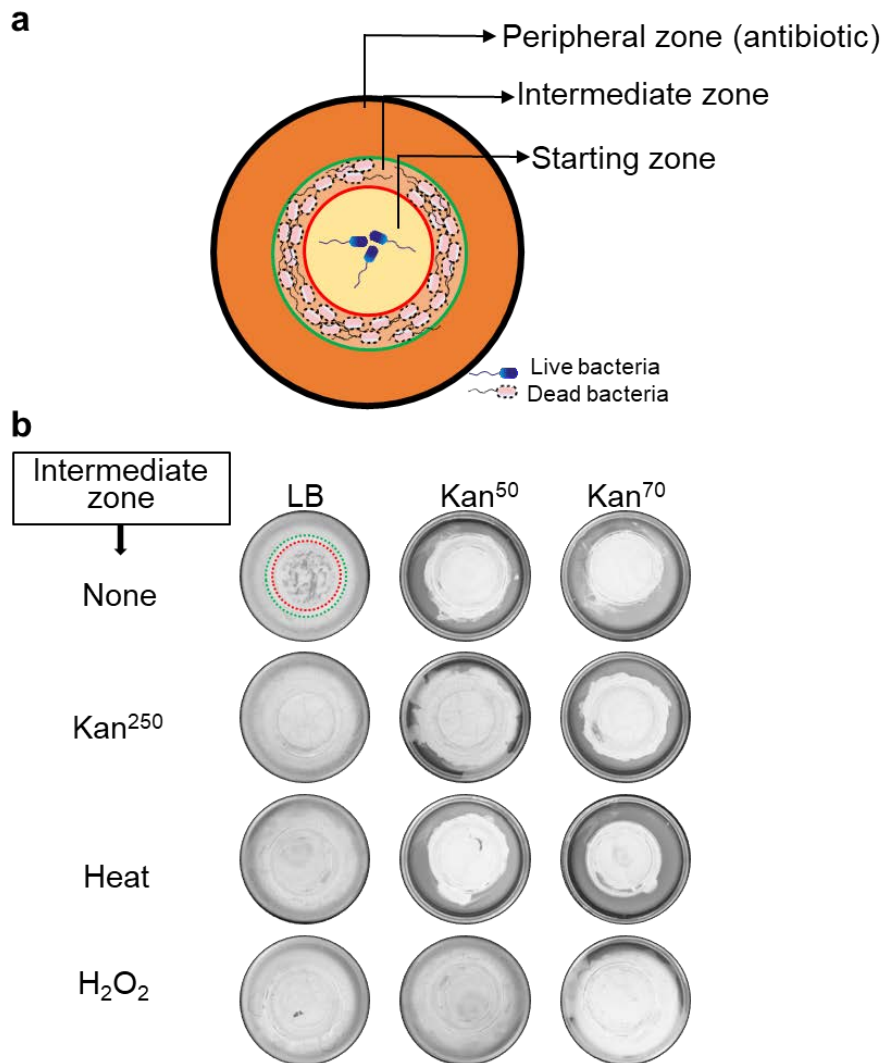

**Supplementary Figure 3. Tri-plate assay showing the sustained nature of the SR response. a.** Cartoon demonstrating placement of plates of different diameters inside one another to create three swarming zones as labeled, with narrow agar bridges connecting the chambers as described in Figure 2a. **b.** WT *E. coli* was inoculated in the starting zone in all plates. The composition of cells deposited on the intermediate zone is indicated on the left. The presence and concentration of antibiotics in the peripheral zone is indicated above each row of plates. The data show that cells swarming over the intermediate dead cell zone are potentiated for SR even after exiting this zone, as seen by their ability to swarm on the peripheral antibiotic zone. This response is most pronounced with 50 mM H<sub>2</sub>O<sub>2</sub>, promoting swarming on Kan<sup>70</sup> in the peripheral zone. Heat destroys the response. Dotted red and green circles on the top left tri-plate show outlines of smallest and medium sized plates, respectively.

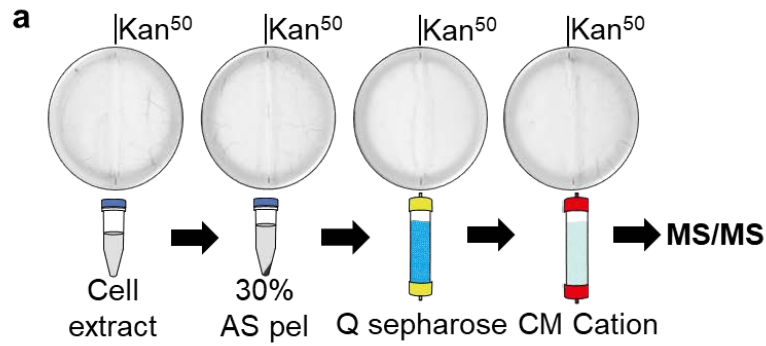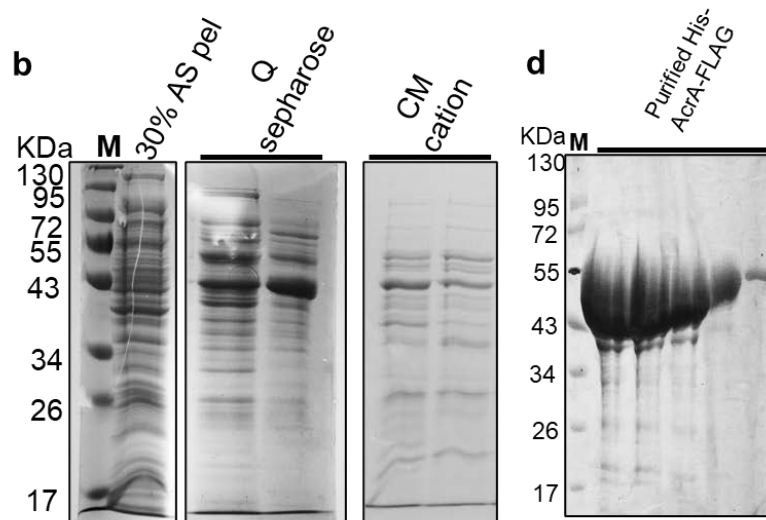

**c**

| Step         | Minimum protein required for activity (mg) | Fold purification |
|--------------|--------------------------------------------|-------------------|
| Cell extract | 12.7                                       | 1                 |
| 30% pellet   | 2.194                                      | 5.78              |
| Q sepharose  | 0.119                                      | 106.72            |
| CM cation    | 0.073                                      | 173.97            |

**Supplementary Figure 4. Purification of the necrosignal from *E. coli* and *Salmonella*.** **a.** Necrosignaling activity in cell extract supernatants was precipitated with ammonium sulfate (AS pel), resuspended and fractionated over Q Sepharose and CM Cation exchange columns, and analyzed by MS/MS. See Methods for purification details. Plates shown are for *E. coli*. **b.** 12% SDS-PAGE gels showing *E. coli* active fractions from 30% AS pel, Q Sepharose (fractions 5 and 6) and CM cation (fractions 1 and 2); M, protein MW markers. **c.** Table showing fold-purification achieved in *E. coli*. **d.** Gel from 12% SDS-PAGE showing purification of His- and FLAG-tagged AcrA. From left to right, fractions 1-5 from a 5-step imidazole gradient elution (see Methods). 10  $\mu$ l of each fraction was loaded on the gel. Source data are provided as a Source Data file.

| <i>Escherichia coli</i>          |                                                         |      |          |
|----------------------------------|---------------------------------------------------------|------|----------|
| Uniprot ID                       | Protein description                                     | Name | MW (kDa) |
| P06959                           | Pyruvate dehydrogenase, E2 subunit                      | AceF | 66       |
| P0AE06                           | Multidrug efflux pump subunit AcrA                      | AcrA | 42       |
| P69228                           | DNA-binding transcriptional regulator BaeR              | BaeR | 21       |
| P0ACJ8                           | DNA-binding transcriptional dual regulator CRP          | Crp  | 24       |
| P0A6P9                           | Enolase                                                 | Eno  | 46       |
| P0A9X4                           | Dynamic cytoskeletal protein MreB                       | MreB | 37       |
| P23836                           | DNA-binding transcriptional dual regulator PhoP         | PhoP | 26       |
| P0ADY1                           | Periplasmic folding chaperone                           | PpiD | 68       |
| P0CG19                           | truncated RNase PH                                      | Rph  | 24       |
| P0A7V8                           | 30S ribosomal protein S4                                | RpsD | 23       |
| P0AAC0                           | universal stress protein                                | UspE | 21       |
| P0AFP4                           | NADP+-dependent aldehyde reductase                      | YbbO | 29       |
| P77316                           | Zinc-type alcohol dehydrogenase-like protein YbdR       | YbdR | 44       |
| P0A8W8                           | UPF0304 protein YfbU                                    | YfbU | 20       |
| P76550                           | uncharacterized protein YffS                            | YffS | 30       |
| P0ADT8                           | Uncharacterized protein                                 | YgiM | 23       |
| P0A742                           | putative transporter                                    | YhdC | 43       |
| P64429                           | uncharacterized protein YpfJ                            | YpfJ | 31       |
| <i>Salmonella Enterica 14028</i> |                                                         |      |          |
| Uniprot ID                       | Protein description                                     | Name | MW (kDa) |
| Q8ZRA6                           | Multidrug efflux pump subunit AcrA                      | AcrA | 42       |
| Q8ZK33                           | Arginine deiminase                                      | ArcA | 46       |
| Q8ZNP8                           | DNA-binding transcriptional regulator                   | BaeR | 27       |
| P0A2T6                           | DNA-binding transcriptional dual regulator CRP          | Crp  | 27       |
| Q8ZQD3                           | Anaerobic dimethyl sulfoxide reductase, subunit A       | DmsA | 90       |
| P06179                           | Flagellin protein                                       | FliC | 51       |
| Q8ZRU0                           | Cell division protein                                   | FtsZ | 40       |
| P0A1H3                           | Traslation elongation factor G                          | FusA | 77       |
| Q8ZNG5                           | Glycerol-3-phosphate dehydrogenase subunit A            | GlpA | 59       |
| Q8ZLH4                           | Glycerol-3-phosphate dehydrogenase                      | GlpD | 56       |
| Q8ZN59                           | Inosine-5'-monophosphate dehydrogenase                  | GuaB | 51       |
| Q8ZN40                           | Cysteine desulfurase IscS                               | IscS | 45       |
| Q8ZRT0                           | Dihydrolipoyl dehydrogenase                             | LpdA | 50       |
| Q9RCI2                           | tRNA-2-methylthio-N(6)-dimethylallyl adenosine synthase | MiaB | 53       |
| Q8ZP10                           | Septum site-determining protein                         | MinD | 29       |
| Q8ZLJ7                           | Transpeptidase of penicillin-binding protein 1a         | MrcA | 94       |
| P41033                           | Phosphoenolpyruvate carboxykinase                       | PckA | 59       |
| Q8ZK80                           | 50S ribosomal protein L9                                | RplI | 15       |
| Q8ZRT7                           | Protein translocase subunit SecA                        | SecA | 101      |
| Q8ZP84                           | Universal stress protein                                | UspE | 35       |
| Q8ZPP0                           | Inner membrane transport protein                        | YdhC | 42       |

**Supplementary Figure 5. MS/MS analysis of the SR-promoting active fraction from *E. coli* and *Salmonella*.** The active fractions analyzed were obtained from the CM cation step of purification. See Supplementary Figure 4 and Methods. 19 proteins were identified for *E. coli* and 21 proteins for *Salmonella*; of these, 5 proteins were common.



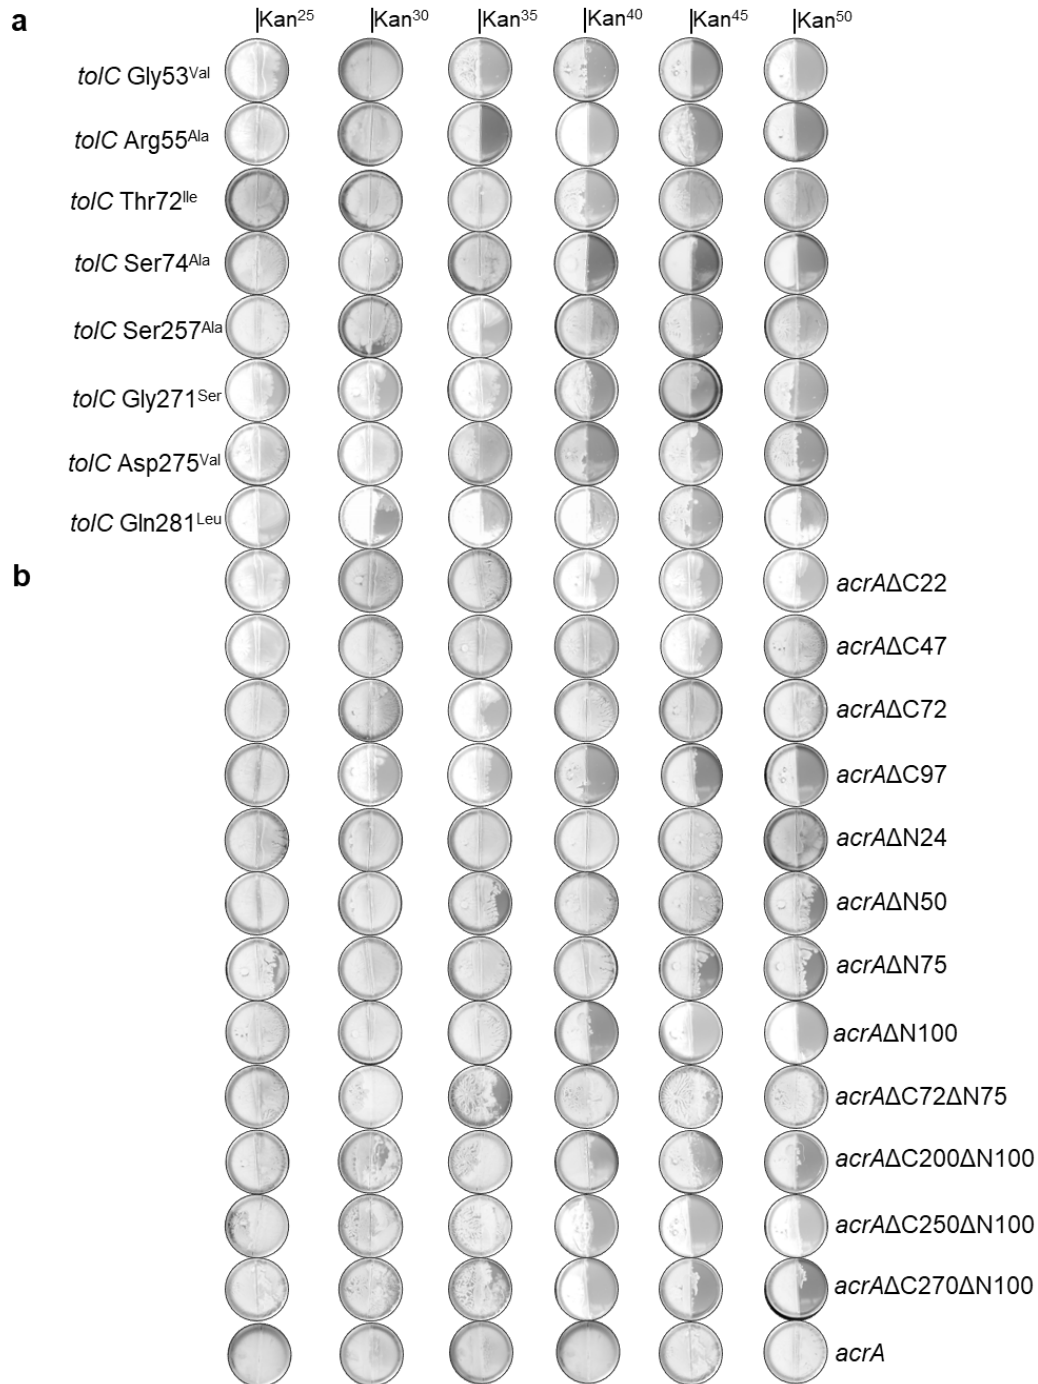

**Supplementary Figure 6. Primary data for results summarized in Fig 4c. a.** Border crossing assay with *toIC* mutants. The  $\Delta toIC^{AK}$  strain with indicated mutants were inoculated in the left chamber and purified AcrA was applied on the right. The WT control for this panel is found in Figure 4, a2. **b.** Border crossing assay with *acrA* mutants. WT cells were inoculated on the left and pre-killed cells ( $\Delta acrA^{AK}$ ) expressing indicated *acrA* mutants from pTrc99a plasmids were applied on the right. Indicated Kan concentrations are for the right chamber.

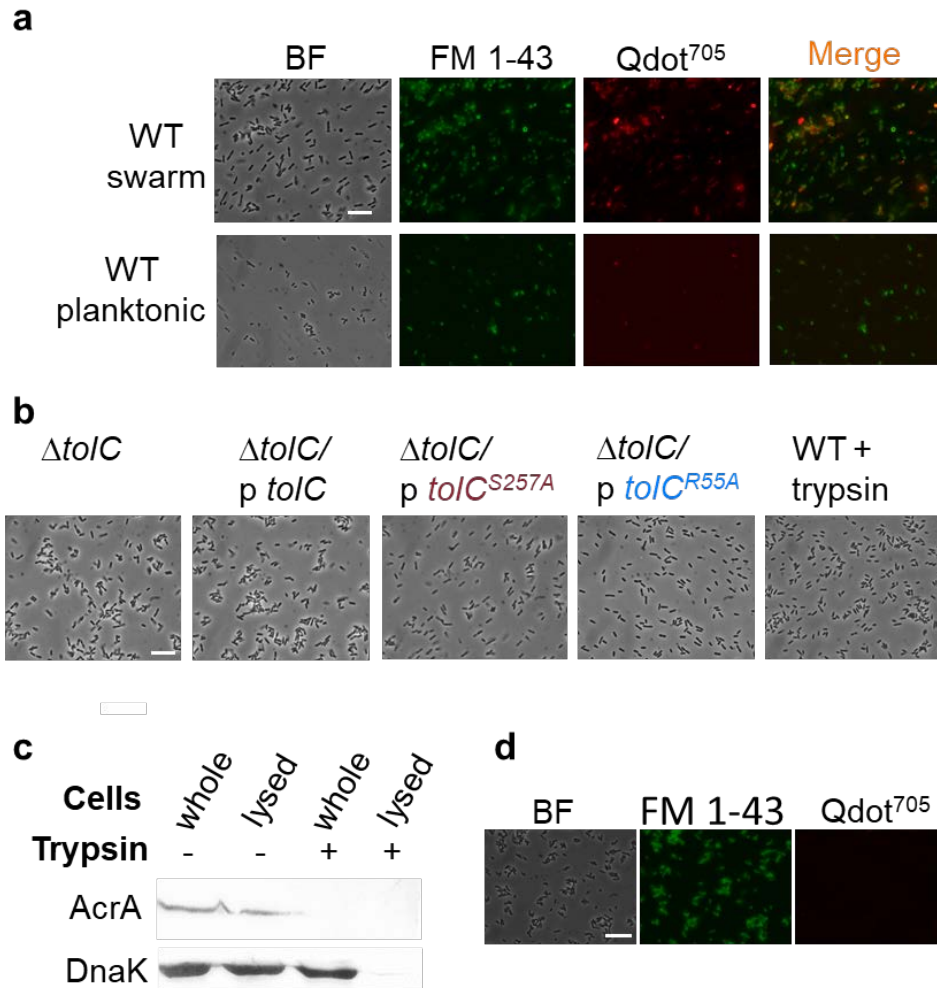

**Supplementary Figure 7. Binding of extracellular AcrA to TolC on planktonic and swarm cells of *E. coli*.** **a.** Imaging of cells probed with QDot<sup>705</sup> anti-FLAG antibody and FM-143 (see Methods). The entire field of view (for each channel under the microscope) of the images that were enlarged in Figure 4d, are observable here. Swarm cells are approximately twice as long as planktonic cells<sup>2</sup>. Scale bar, 10  $\mu$ m. **b.** Bright field images of swarm cells shown in Figure 4e. *toIC* mutant font color Blue = SR+, maroon = SR-. **c.** Western blot analysis for detecting AcrA localization after trypsin digestion of cell samples used for microscopy in Figure 4d (see Methods). DnaK was used as a cytoplasmic control. Absence of bands for AcrA (FLAG-tagged) from whole cells treated with trypsin indicate extracellular localization of AcrA in the binding experiment shown in (a). **d.** Additional control showing that Qdot<sup>705</sup> alone, i.e. without addition of AcrA-FLAG protein, does not localize to membrane. Source data are provided as a Source Data file.

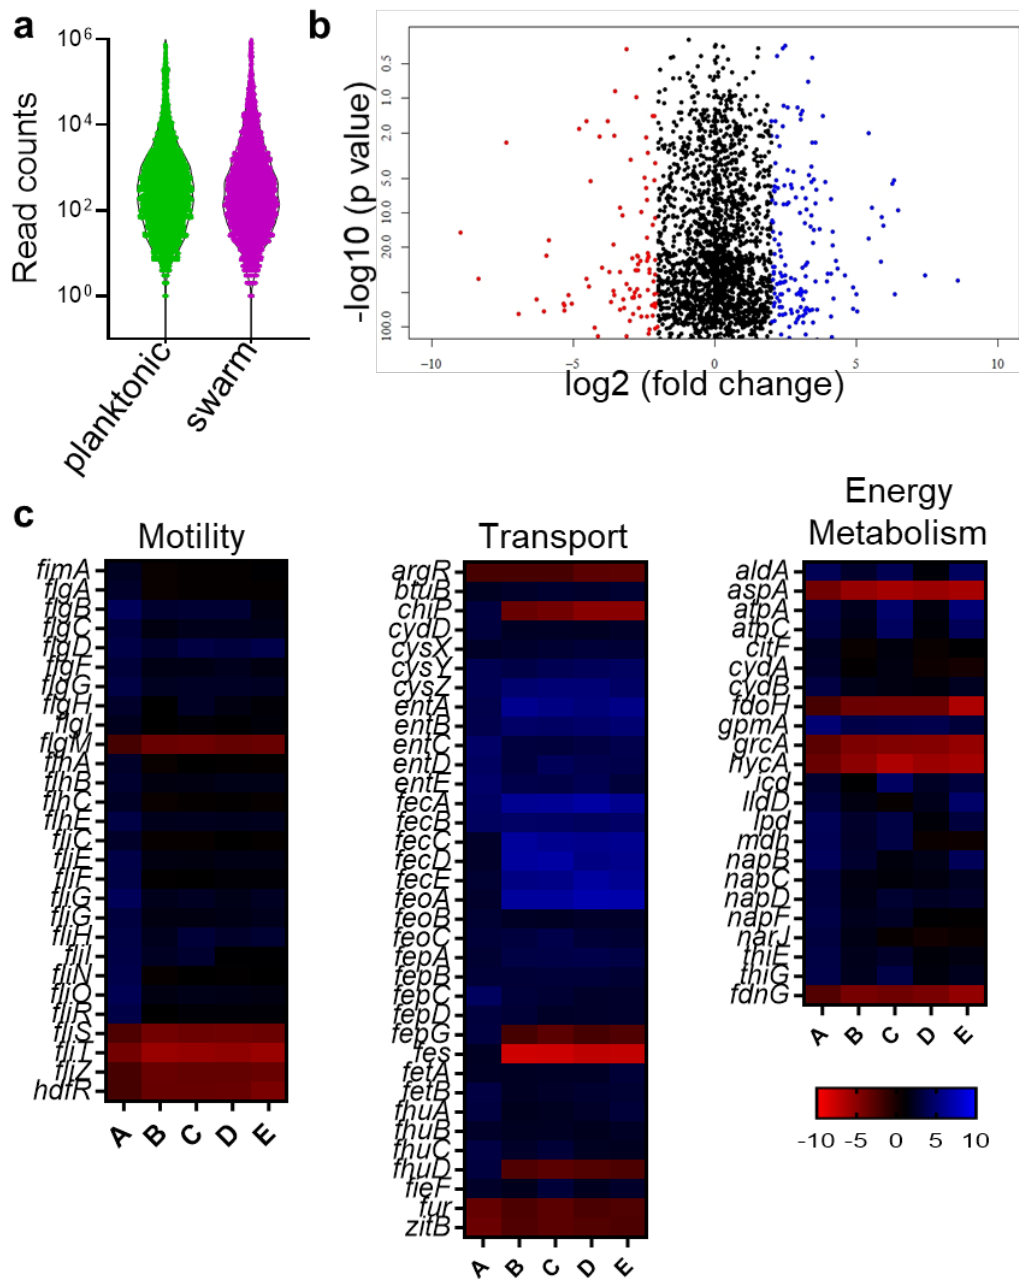

**Supplementary Figure 8. RNA-seq analysis of swarm and planktonic cells of *E. coli*.** **a.** Distribution of mapped read counts for genes showing sequencing consistency across samples. **b.** A representative scatter plot showing fold change and adjusted p-value distributions of genes for swarm vs planktonic. A  $\pm 2$   $\log_2$  fold change cutoff was used to identify up or downregulated genes. The blue and red dots represent  $\log_2$  fold change with a value of  $\geq 2$  and  $\leq -2$ , respectively. **c.** Heat maps showing changes in expression of the different gene classes (motility, transport, energy metabolism) across the following comparisons: A) Swarm vs Planktonic, B) Swarm vs Swarm+ Kan<sup>20</sup>, C) Swarm vs Swarm+Kan<sup>20</sup>+AcrA (0.1  $\mu\text{g/ml}$ ), D) Swarm vs Swarm+Cip<sup>2.5</sup>, E) Swarm vs Swarm+ Cip<sup>2.5</sup>+AcrA (0.1  $\mu\text{g/ml}$ ). See Supplementary Data 1 for expression values. Source data are provided as a Source Data file.

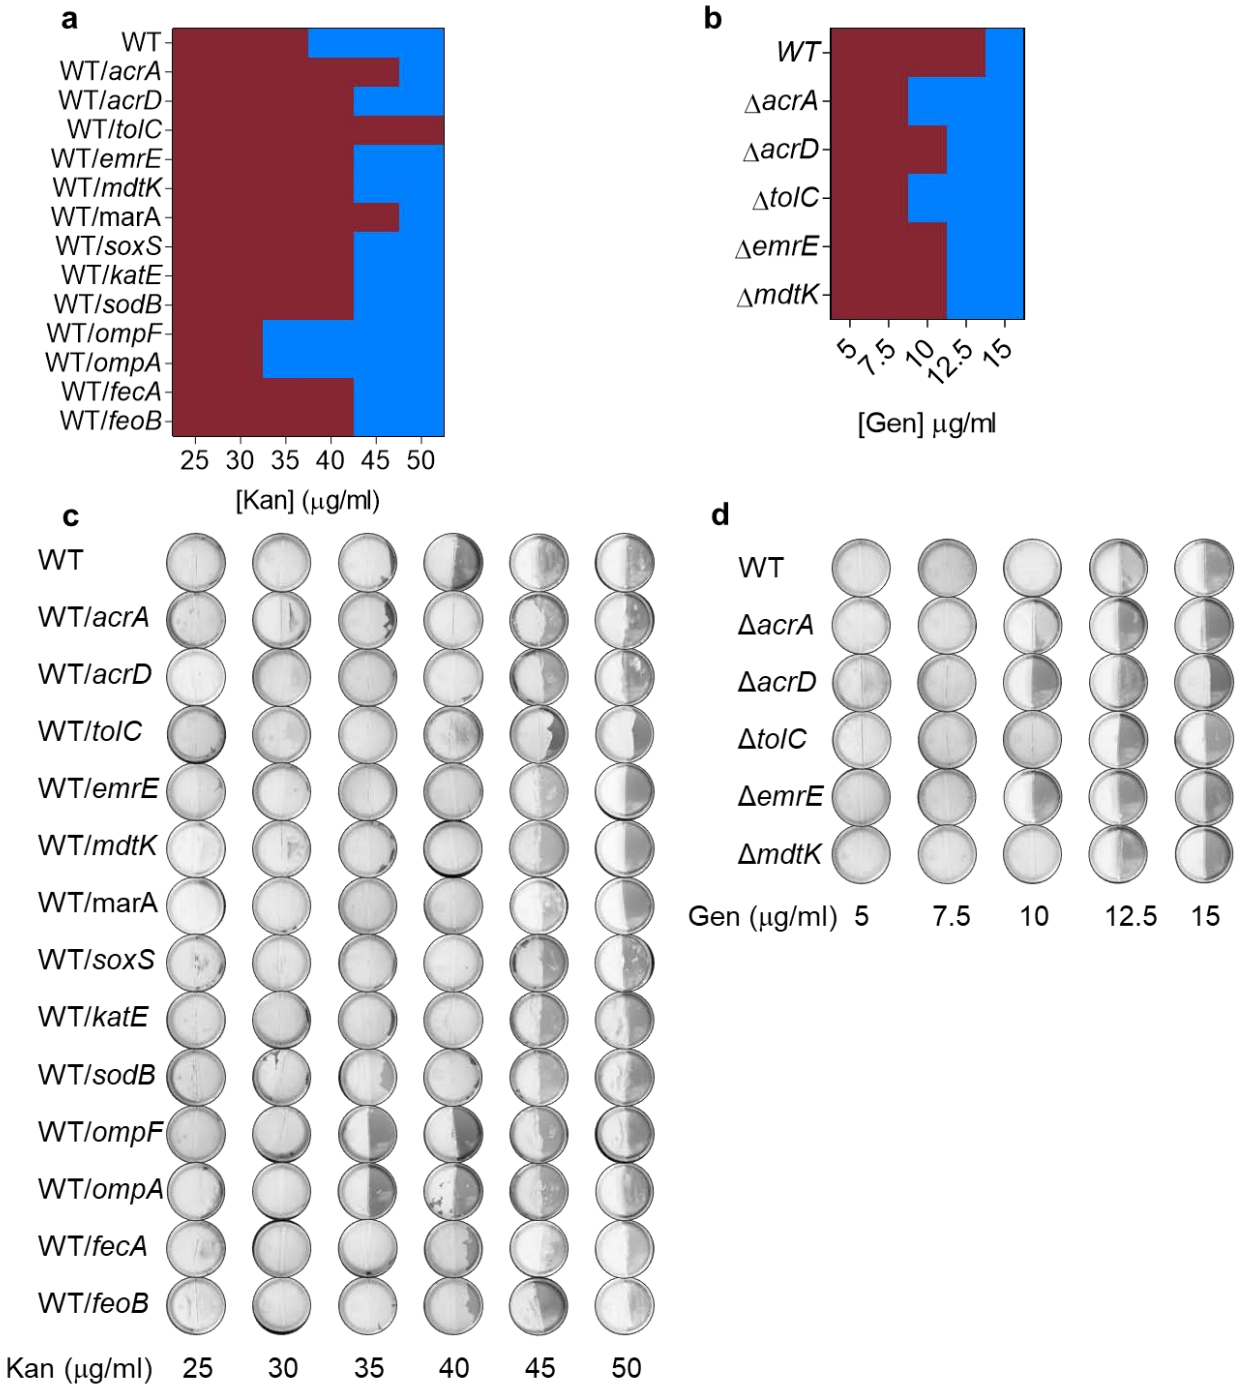

**Supplementary Figure 9. Validation of RNA-seq results through genetic analysis.** Summary of border crossing assays. Blue, SR+; Maroon, SR-. WT *E. coli* carrying plasmids from ASKA library or gene deletions were inoculated on the left. **a.** The overexpression of selected components from different classes of efflux pumps (*acrA*, *acrD*, *tolC*, *emrE*, *mdtK*) and their regulators (*marA* and *soxS*), ROS catabolism genes (*katE* and *sodB*), and iron transport genes (*fepA* and *feoB*) showed an increase in SR. Porins *ompF* and *ompA* reduced SR. **b.** Deletion strains of selected efflux pump genes (*acrA*, *acrD*, *tolC*, *mdtK*, and *emrE*), inoculated on the left, reduced SR. Gentamycin [Gen] was used in the right chamber as these strains harbor a Kan<sup>R</sup> marker. **c-d.** Raw data for **a** and **b** respectively.

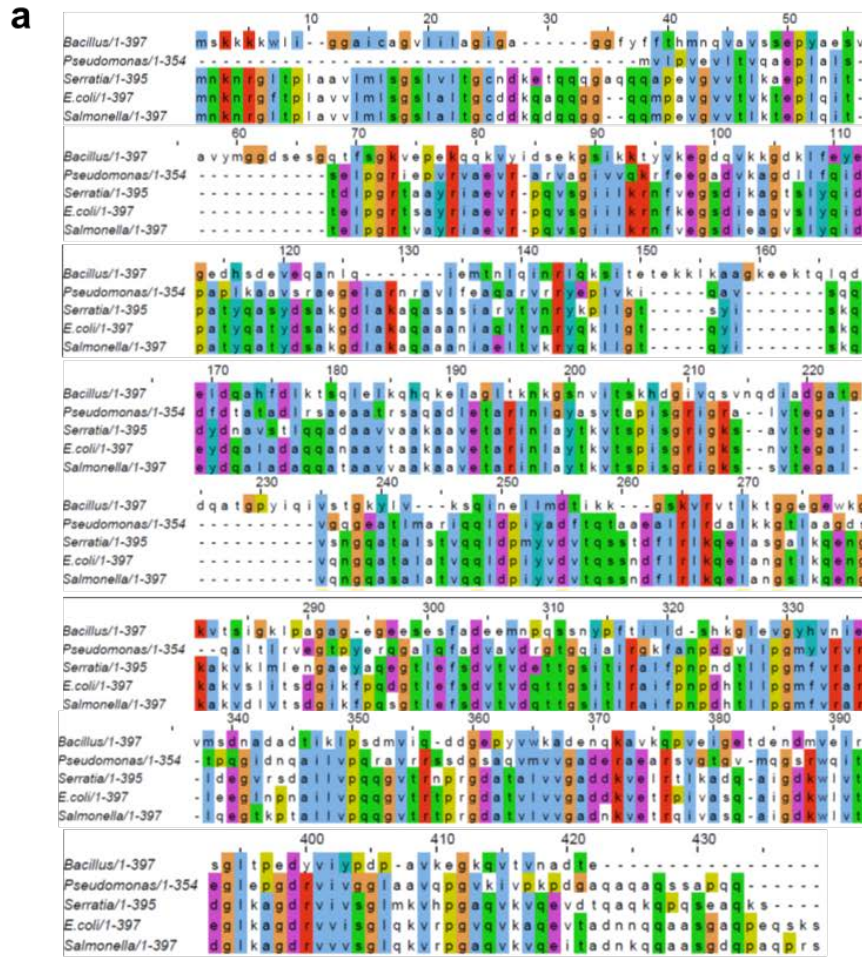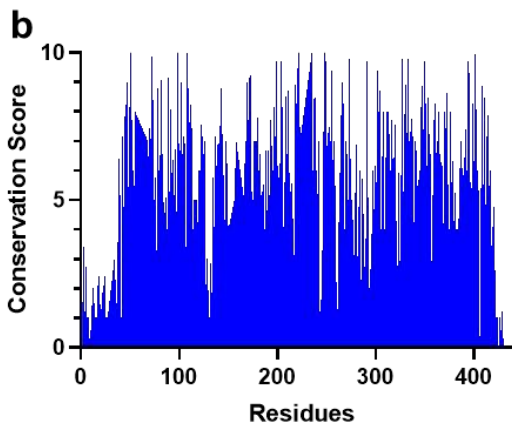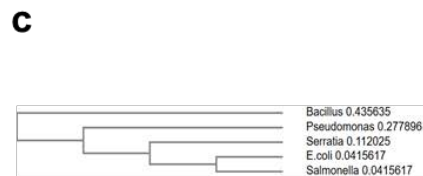

**Supplementary Figure 10. Comparison of AcrA sequences in five organisms used in this study. a.** Multiple Sequence Alignment (MSA) of AcrA sequences (see Methods). **b.** Graph showing variations in conservation scores across residues; numbering relates to *E. coli* AcrA sequence. **c.** A cladogram of AcrA sequences.

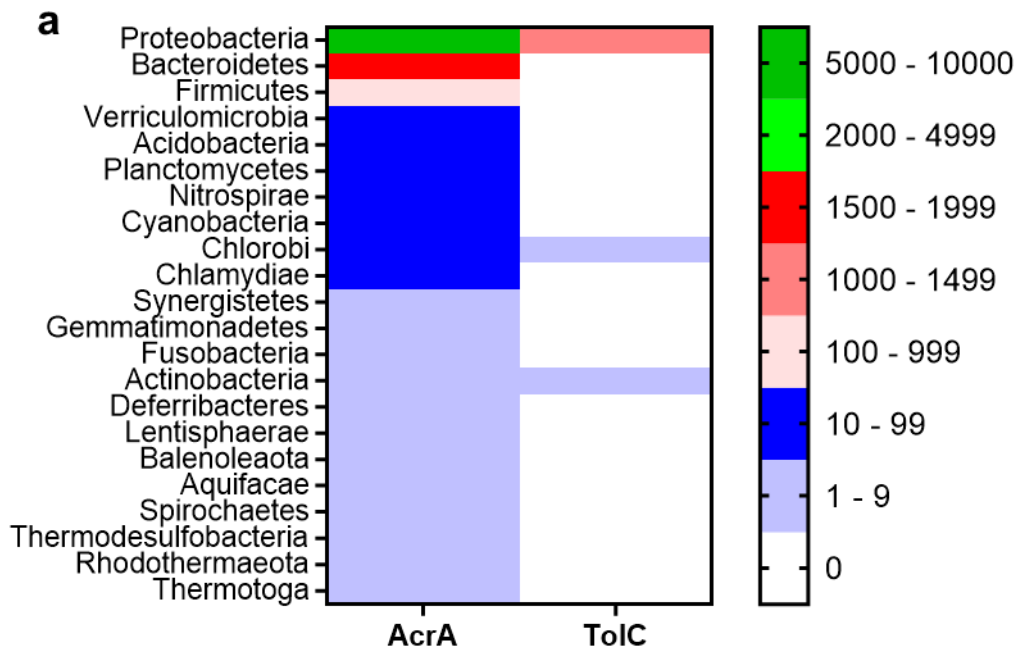

**Supplementary Figure 11. Distribution of AcrA and ToIC across the Bacterial domain.** The sequences of AcrA and ToIC of *E. coli* were used to perform a search using HMMER algorithm<sup>3</sup> within bacterial taxa. The significant 'e value' cutoff was  $10^{-20}$ . A decrease or increase in the cutoff ( $10^{-10}$  to  $10^{-3}$ ) did not alter the pattern of results significantly. The values show the number of hits obtained across different taxa.

## Supplementary Tables

### Supplementary Table 1. Strains, Plasmids, and Primers

| Strain/Plasmid                       | Genotype                                                          | Source and/or reference |
|--------------------------------------|-------------------------------------------------------------------|-------------------------|
| <b>Strains</b>                       |                                                                   |                         |
| <b><i>Escherichia coli</i></b>       |                                                                   |                         |
| MG1655                               | Wild type; F <sup>-</sup> λ <sup>-</sup> <i>rph-1</i>             | 4                       |
| Δ <i>acrA</i>                        | MG1655 Δ <i>acrA</i> ::Kan <sup>R</sup>                           | This study              |
| Δ <i>acrA</i> <sup>ΔK</sup>          | MG1655 Δ <i>acrA</i> , Kan <sup>R</sup> removed                   |                         |
| Δ <i>uspE</i>                        | MG1655 Δ <i>uspE</i> ::Kan <sup>R</sup>                           |                         |
| Δ <i>baeR</i>                        | MG1655 Δ <i>baeR</i> ::Kan <sup>R</sup>                           |                         |
| Δ <i>yhdC</i>                        | MG1655 Δ <i>yhdC</i> ::Kan <sup>R</sup>                           |                         |
| Δ <i>tolC</i>                        | MG1655 Δ <i>tolC</i> ::Kan <sup>R</sup>                           |                         |
| Δ <i>tolC</i> <sup>ΔK</sup>          | MG1655 Δ <i>tolC</i> , Kan <sup>R</sup> removed                   |                         |
| Δ <i>acrD</i>                        | MG1655 Δ <i>acrD</i> ::Kan <sup>R</sup>                           |                         |
| Δ <i>emrE</i>                        | MG1655 Δ <i>emrE</i> ::Kan <sup>R</sup>                           |                         |
| Δ <i>mdtK</i>                        | MG1655 Δ <i>mdtK</i> ::Kan <sup>R</sup>                           |                         |
| <b><i>Salmonella enterica</i></b>    |                                                                   |                         |
| serovar Typhimurium 14028            | Wild type; LT2 ( <i>fljB</i> -off) Δ( <i>hin</i> - <i>fljAB</i> ) | ATCC                    |
| <b><i>Serratia marcescens</i></b>    |                                                                   |                         |
| 274                                  | Wild type                                                         | ATCC                    |
| <b><i>Bacillus subtilis</i></b>      |                                                                   |                         |
| 3610                                 | Motile wild type                                                  | 5                       |
| <b><i>Pseudomonas aeruginosa</i></b> |                                                                   |                         |
| PAO1                                 | Wild type                                                         | Lab collection          |
| <b>Plasmids</b>                      |                                                                   |                         |
| pCA24N                               | From ASKA collection, Cam <sup>R</sup>                            | ASKA <sup>6</sup>       |
| <i>pacrA</i>                         | pCA24N carrying <i>acrA</i>                                       |                         |
| <i>puspE</i>                         | pCA24N carrying <i>uspE</i>                                       |                         |
| <i>pbaeR</i>                         | pCA24N carrying <i>baeR</i>                                       |                         |
| <i>pyhdC</i>                         | pCA24N carrying <i>yhdC</i>                                       |                         |
| <i>pacrD</i>                         | pCA24N carrying <i>acrD</i>                                       |                         |
| <i>ptolC</i>                         | pCA24N carrying <i>tolC</i>                                       |                         |
| <i>pemrE</i>                         | pCA24N carrying <i>emrE</i>                                       |                         |
| <i>pmdtK</i>                         | pCA24N carrying <i>mdtK</i>                                       |                         |
| <i>pmarA</i>                         | pCA24N carrying <i>marA</i>                                       |                         |
| <i>psoxS</i>                         | pCA24N carrying <i>soxS</i>                                       |                         |
| <i>pkatE</i>                         | pCA24N carrying <i>katE</i>                                       |                         |
| <i>psodB</i>                         | pCA24N carrying <i>sodB</i>                                       |                         |
| <i>pompF</i>                         | pCA24N carrying <i>ompF</i>                                       |                         |
| <i>pompA</i>                         | pCA24N carrying <i>ompA</i>                                       |                         |

|                                      |                                                           |            |
|--------------------------------------|-----------------------------------------------------------|------------|
| <i>pfecA</i>                         | pCA24N carrying <i>fecA</i>                               |            |
| <i>pfeoB</i>                         | pCA24N carrying <i>feoB</i>                               |            |
| pTrc99a                              | Cloning vector, P <sub>Trc</sub> and Amp <sup>R</sup> ,   | 7          |
| pT <i>tolC</i>                       | pTrc99a carrying WT <i>tolC</i>                           | This study |
| pT <i>tolC</i> Gly53 <sup>Val</sup>  | pTrc99a carrying mutant <i>tolC</i> Gly53 <sup>Val</sup>  |            |
| pT <i>tolC</i> Arg55 <sup>Leu</sup>  | pTrc99a carrying mutant <i>tolC</i> Arg55 <sup>Leu</sup>  |            |
| pT <i>tolC</i> Thr72 <sup>Ile</sup>  | pTrc99a carrying mutant <i>tolC</i> Thr72 <sup>Ile</sup>  |            |
| pT <i>tolC</i> Ser74 <sup>Ala</sup>  | pTrc99a carrying mutant <i>tolC</i> Ser74 <sup>Ala</sup>  |            |
| pT <i>tolC</i> Ser257 <sup>Ala</sup> | pTrc99a carrying mutant <i>tolC</i> Ser257 <sup>Ala</sup> |            |
| pT <i>tolC</i> Gly271 <sup>Ser</sup> | pTrc99a carrying mutant <i>tolC</i> Gly271 <sup>Ser</sup> |            |
| pT <i>tolC</i> Asp275 <sup>Val</sup> | pTrc99a carrying mutant <i>tolC</i> Asp275 <sup>Val</sup> |            |
| pT <i>tolC</i> Gln281 <sup>Leu</sup> | pTrc99a carrying mutant <i>tolC</i> Gln281 <sup>Leu</sup> |            |
| pT <i>acrA</i>                       | pTrc99a carrying WT <i>acrA</i>                           |            |
| pT <i>acrA</i> ΔC22                  | pTrc99a carrying mutant <i>acrA</i> ΔC22                  |            |
| pT <i>acrA</i> ΔC47                  | pTrc99a carrying mutant <i>acrA</i> ΔC47                  |            |
| pT <i>acrA</i> ΔC72                  | pTrc99a carrying mutant <i>acrA</i> ΔC72                  |            |
| pT <i>acrA</i> ΔC97                  | pTrc99a carrying mutant <i>acrA</i> ΔC97                  |            |
| pT <i>acrA</i> ΔN24                  | pTrc99a carrying mutant <i>acrA</i> ΔN24                  |            |
| pT <i>acrA</i> ΔN50                  | pTrc99a carrying mutant <i>acrA</i> ΔN50                  |            |
| pT <i>acrA</i> ΔN75                  | pTrc99a carrying mutant <i>acrA</i> ΔN75                  |            |
| pT <i>acrA</i> ΔN100                 | pTrc99a carrying mutant <i>acrA</i> ΔN100                 |            |
| pT <i>acrA</i> ΔC72ΔN75              | pTrc99a carrying mutant <i>acrA</i> ΔC72ΔN75              |            |
| pT <i>acrA</i> ΔC200ΔN100            | pTrc99a carrying mutant <i>acrA</i> ΔC200ΔN100            |            |
| pT <i>acrA</i> ΔC250ΔN100            | pTrc99a carrying mutant <i>acrA</i> ΔC250ΔN100            |            |
| pT <i>acrA</i> ΔC270ΔN100            | pTrc99a carrying mutant <i>acrA</i> ΔC270ΔN100            |            |
| <b>Primers</b>                       |                                                           |            |
| <b>Name</b>                          | <b>Sequence (5'→3')</b>                                   |            |
| GLY53 Fp                             | ACCTATAGCAACGTCTACCGCGACGCGAACGGCATCAACT                  |            |
| GLY53 Rp                             | CGCGTCGCGGTAGACGTTGCTATAGGTGTAATCTGCACCT                  |            |
| ARG55 Fp                             | AGCAACGGCTACGCGGACGCGAACGGCATCAACTCT                      |            |
| ARG55 Rp                             | GCCGTTGCGGTCCGCGTAGCCGTTGCTATAGGTGTA                      |            |
| THR72 Fp                             | TCCTTGCAAGTTAATTCATCCATTTTTGATATGTCGAAATGG                |            |
| THR72 Rp                             | AAAATGGATTGAATTAAGTCAAGGACGCACTGGTCGCG                    |            |
| SER74 Fp                             | CAGTTAACTCAAGCCATTTTTGATATGTCGAAATGGCGTGCG                |            |
| SER74 Rp                             | CATATCAAAAATGGCTTGAGTTAACTGCAAGGACGCACTGGT                |            |
| SER257 Fp                            | TCTACCGGGATTGCTGACACCTCTTATAGCGGTTTCGAAAACC               |            |
| SER257 Rp                            | ATAAGAGGTGTCAGCAATCCCGGTAGAAGCCGTTAAATCCAG                |            |
| GLY271 Fp                            | CGTGGTGCCGCTAGTACCCAGTATGACGATAGCAATATGGGC                |            |
| GLY271 Rp                            | GTCATACTGGGTAAGTACGCGCACCCACGGGTTTTTCGAACCGCT             |            |
| ASP275 Fp                            | GGTACCCAGTATGTCGATAGCAATATGGGCCAGAACAAAGTT                |            |
| ASP 275 Rp                           | CATATTGCTATCGACATACTGGGTACCAGCGGCACCACGGGT                |            |
| GLN281 Fp                            | AGCAATATGGGCCTGAACAAAGTTGGCCTGAGCTTCTCGCTG                |            |
| GLN281 Rp                            | GCCAACTTTGTTTCAGGCCCATATTGCTATCGTCATACTGGGT               |            |
| <i>acrA</i> Fp                       | CGAGGTGGATCCATGAACAAAAC                                   |            |
| <i>acrA</i> Rp                       | GCTCAAGCTTAAGTTAAGACTTG                                   |            |



|                    |                                                |
|--------------------|------------------------------------------------|
| acrADC22 Rp        | TGCTTTTACCTGGACACCAGGTAAAAGCTTAGAT             |
| acrADC47 Rp        | TGTCACCAGCCACTTATCGCCTAAAAGCTTAGAT             |
| acrADC72 Rp        | TACCAGTACGGTGGCATCGCCTAAAAGCTTAGAT             |
| acrADC97 Rp        | CCCTTCTTCCAGACGTGCGCGTAAAAGCTTAGAT             |
| acrADC200 Rp       | GTTCTGTACCAATGCGCCTTCTAAAAGCTTAGAT             |
| acrADC250 Rp       | CAGAGCCTGATCGTACTCTTGTAAGCTTAGAT               |
| acrADC270 Rp       | ATTCACCGTCAATTGCGCGATTAAGCTTAGAT               |
| acrADN24 Fp        | GTACGGATCCATGTGTGACGACAAACAGGCCCAA             |
| acrADN50 Fp        | GTACGGATCCATGCAGATCACAACCGAGCTTCCG             |
| acrADN75 Fp        | GTACGGATCCATGATCCTGAAGCGTAATTTCAA              |
| acrADN100 Fp       | GTACGGATCCATGTATCAGGCGACATACGACAGT             |
| arcA N ter His Fp  | CATGAGCTCATGCATCATCATCATCACTGTGACGACAAA        |
| acrA C-ter FLAG Rp | TTAAGCTTAGTCGTCATCGTCTTTGTAGTCAGACTTGGACTGTTCC |

**Supplementary Table 2. Results of Statistical analysis of data in Supplementary Figure 1a**

See Supplementary Figure 1 legend for details.

| Kan Concentration | p value (swarm experimental vs planktonic experimental) |           |           |           |
|-------------------|---------------------------------------------------------|-----------|-----------|-----------|
|                   | 0.5 h                                                   | 1 h       | 1.5 h     | 2 h       |
| 2.5               | 0.015258                                                | 0.050506  | 0.696204  | 0.728697  |
| 5                 | 0.0173                                                  | 0.01771   | 0.347403  | 0.07399   |
| 7.5               | 0.01991                                                 | 0.049421  | 0.34826   | 0.079605  |
| 10                | 0.04439                                                 | 0.149273  | 0.03715   | 0.000069  |
| 12.5              | 0.025151                                                | 0.044125  | 0.000353  | 0.000009  |
| 15                | 0.015377                                                | 0.000055  | 0.000016  | 0.000011  |
| 17.5              | <0.000001                                               | <0.000001 | <0.000001 | <0.000001 |
| 20                | 0.000007                                                | <0.000001 | <0.000001 | <0.000001 |
| 22.5              | 0.000004                                                | <0.000001 | <0.000001 | <0.000001 |
| 25                | <0.000001                                               | <0.000001 | <0.000001 | <0.000001 |
| 27.5              | <0.000001                                               | <0.000001 | <0.000001 | <0.000001 |
| 30                | 0.00216                                                 | 0.000005  | 0.000047  | 0.000095  |
| 32.5              | 0.00229                                                 | 0.00514   | 0.0059    | 0.00893   |
| 35                | 0.02494                                                 | 0.138682  | 0.24732   | 0.34833   |
| 37.5              | 0.078213                                                | 0.18495   | 0.293395  | 0.112014  |
| 40                | 0.164641                                                | <0.13922  | 0.127767  | 0.072741  |

[ns= not significant, \* $p < 0.05$ , \*\* $p < 0.01$ , and \*\*\* $p < 0.001$ ]

## References

- 1 Williams, R. P., Gott, C. L., Qadri, S. M. & Scott, R. H. Influence of temperature of incubation and type of growth medium on pigmentation in *Serratia marcescens*. *Journal of bacteriology* **106**, 438-443 (1971).
- 2 Partridge, J. D. & Harshey, R. M. More than motility: Salmonella flagella contribute to overriding friction and facilitating colony hydration during swarming. *Journal of bacteriology* **195**, 919-929, doi:10.1128/JB.02064-12 (2013).
- 3 Potter, S. C. *et al.* HMMER web server: 2018 update. *Nucleic acids research* **46**, W200-W204, doi:10.1093/nar/gky448 (2018).
- 4 Guyer, M. S., Reed, R. R., Steitz, J. A. & Low, K. B. Identification of a sex-factor-affinity site in *E. coli* as gamma delta. *Cold Spring Harbor symposia on quantitative biology* **45 Pt 1**, 135-140, doi:10.1101/sqb.1981.045.01.022 (1981).
- 5 Kearns, D. B. & Losick, R. Swarming motility in undomesticated *Bacillus subtilis*. *Molecular microbiology* **49**, 581-590, doi:10.1046/j.1365-2958.2003.03584.x (2003).
- 6 Kitagawa, M. *et al.* Complete set of ORF clones of *Escherichia coli* ASKA library (a complete set of *E. coli* K-12 ORF archive): unique resources for biological research. *DNA research : an international journal for rapid publication of reports on genes and genomes* **12**, 291-299, doi:10.1093/dnares/dsi012 (2005).
- 7 Amann, E., Brosius, J. & Ptashne, M. Vectors bearing a hybrid trp-lac promoter useful for regulated expression of cloned genes in *Escherichia coli*. *Gene* **25**, 167-178, doi:10.1016/0378-1119(83)90222-6 (1983).
