# Supplementary material for: Dead cells release a ‘necrosignal’ that activates antibiotic survival pathways in bacterial swarms
Source: PubMed Central journal article supplement (PMC7438516; doi:10.1038/s41467-020-17709-0), 2020-08-19
Supplement: 41467_2020_17709_MOESM4_ESM.pdf [file 41467_2020_17709_MOESM4_ESM.pdf]

## **Description of Additional Supplementary Files**

Supplementary Data 1: Table showing comparison of expression values of genes from swarm and planktonic samples, represented as log<sub>2</sub> fold change.
